# Supplementary material
Source: HighWire-hosted journal article supplement (https://erj.ersjournals.com/content/54/6/1901791)
Supplement: inline-supplementary-material-1 [file inline-supplementary-material-1.pdf]

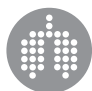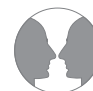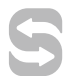

SHAREABLE PDF

# International trends in COPD mortality, 1995–2017

Joannie Lortet-Tieulent <sup>1</sup>, Isabelle Soerjomataram <sup>1</sup>, José Luis López-Campos <sup>2,3</sup>, Julio Ancochea<sup>4</sup>, Jan Willem Coebergh <sup>5</sup> and Joan B. Soriano <sup>2,4</sup>

**Affiliations:** <sup>1</sup>Section of Cancer Surveillance, International Agency for Research on Cancer, Lyon, France. <sup>2</sup>Centro de Investigación Biomédica en Red de Enfermedades Respiratorias (CIBERES), Instituto de Salud Carlos III, Madrid, Spain. <sup>3</sup>Unidad Médico-Quirúrgica de Enfermedades Respiratorias, Instituto de Biomedicina de Sevilla (IBiS), Hospital Universitario Virgen del Rocío/Universidad de Sevilla, Seville, Spain. <sup>4</sup>Instituto de Investigación, Hospital Universitario de la Princesa, Universidad Autónoma de Madrid, Madrid, Spain. <sup>5</sup>Dept of Public Health, Erasmus MC University Medical Center, Rotterdam, The Netherlands.

**Correspondence:** Joannie Lortet-Tieulent, Section of Cancer Surveillance, International Agency for Research on Cancer, Lyon, France. E-mail: [tieulentj@fellows.iarc.fr](mailto:tieulentj@fellows.iarc.fr)

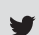

@ERSpublications

**In our international study over 1995–2017, COPD mortality rates declined in most countries. Yet, in females, they remained stable in North America and increased in six countries in Europe. The number of deaths increased or remained stable in most countries.** <http://bit.ly/2niUQ8d>

**Cite this article as:** Lortet-Tieulent J, Soerjomataram I, López-Campos JL, *et al.* International trends in COPD mortality, 1995–2017. *Eur Respir J* 2019; 54: 1901791 [<https://doi.org/10.1183/13993003.01791-2019>].

This single-page version can be shared freely online.

## To the Editor:

Since 2016, chronic obstructive pulmonary disease (COPD) has been the third-leading cause of death worldwide, with an estimated 3 million deaths (5.3% of all deaths), but with large regional variations [1]. Observed data from high-income countries (HICs) [2–5] and modelled data in two global studies [6, 7] have reported declines in COPD mortality rates since the 1990s. Globally, since 2006, modelled COPD mortality rates decreased by 21% [8]. Yet, little is known about observed trends in COPD mortality in Latin America, and more recently in Oceania and Europe.
